# Supplementary material for: Heart Rate Variability in Acute Myocardial Infarction: Results of the HeaRt-V-AMI Single-Center Cohort Study
Source: Preprints.org preprint supplement (doi:10.20944/preprints202407.2005.v1), 2024-07-25
Supplement: Supplementary file 1 [file supplementary]

**Table S3.** HRV parameters correlated significantly with in-hospital mortality.

| **HRV parameters** | **Spearman’s rho** | **P-value** |
| --- | --- | --- |
| *HRV during entire PCI duration* | | |
| LF, log | -0.194 | p = 0.048 |
| SD2/SD1 | -0.262 | p = 0.007 |
| ApEn | -0.233 | p = 0.017 |
| *HRV in the first 5 minutes of PCI* | | |
| SD2/SD1 | -0.273 | p = 0.005 |
| *HRV in the last 5 minutes of PCI* | | |
| SD2/SD1 | -0.235 | p = 0.016 |
| ApEn = approximate entropy; HRV = heart rate variability; LF = power in low-frequency range; PCI = percutaneous coronary intervention | | |

| **HRV parameters** | **Deceased** | **Survivors** | **P-value** |
| --- | --- | --- | --- |
| *HRV during entire PCI duration* | | | |
| SDNN, median (IQR), ms | 23.9 (20.2-35.6) | 29.2 (21.2-41.1) | p = 0.806 |
| RMSSD, median (IQR), ms | 38.9 (29.8-49.5) | 32.3 (25.1-46.1) | p = 0.361 |
| NN50, median (IQR), beats | 102.0 (51.0-106.0) | 86.5 (32.2-167.7) | p = 0.981 |
| pNN50, median (IQR), % | 14.1 (7.3-22.5) | 7.2 (2.9-17.4) | p = 0.205 |
| RR triangular index, median (IQR), ms | 5.7 (4.9-6.3) | 6.3 (5.3-8.8) | p = 0.447 |
| VLF, median (IQR), ms2 | 33.3 (29.2-76.2) | 75.8 (37.7-142.6) | p = 0.155 |
| VLF, median (IQR), log | 3.5 (3.3-4.3) | 4.3 (3.6-4.9) | p = 0.157 |
| LF, median (IQR), ms2 | 178.5 (113.5-194.5) | 391.0 (178.2-681.7) | p = 0.064 |
| LF, median (IQR), log | 5.1 (4.7-5.2) | 5.9 (5.1-6.5) | p = 0.052 |
| LF, median (IQR), n.u. | 63.8 (58.0-70.4) | 66.9 (59.9-74.8) | p = 0.369 |
| HF, median (IQR), ms2 | 100.4 (81.6-106.4) | 178.7 (96.5-323.5) | p = 0.108 |
| HF, median (IQR), log | 4.6 (4.4-4.6) | 5.1 (4.5-5.7) | p = 0.106 |
| HF, median (IQR), n.u. | 35.9 (29.4-41.7) | 32.7 (25.0-39.7) | p = 0.373 |
| LF/HF median (IQR) | 1.7 (1.3-2.3) | 2.0 (1.5-2.9) | p = 0.352 |
| SD1, median (IQR), ms | 27.5 (21.1-35.1) | 22.8 (17.7-32.6) | p = 0.349 |
| SD2, median (IQR), ms | 19.7 (19.2-36.3) | 33.3 (22.7-45.2) | p = 0.240 |
| SD2/SD1, median (IQR) | 0.9 (0.8-1.0) | 1.3 (1.0-1.6) | **p = 0.008** |
| ApEn, median (IQR) | 1.2 (1.0-1.2) | 1.3 (1.2-1.4) | **p = 0.019** |
| *HRV in the first 5 minutes of PCI* | | | |
| SDNN, median (IQR), ms | 32.3 (20.5-44.8) | 29.3 (21.0-43.5) | p = 0.841 |
| RMSSD, median (IQR), ms | 51.9 (32.0-69.0) | 36.3 (24.3-51.5) | p = 0.240 |
| NN50, median (IQR), beats | 23.0 (17.0-33.0) | 28.5 (11.0-50.7) | p = 0.847 |
| pNN50, median (IQR), % | 26.1 (7.4-26.6) | 9.1 (2.8-20.5) | p = 0.174 |
| RR triangular index, median (IQR), ms | 5.1 (4.8-6.4) | 6.2 (4.8-9.1) | p = 0.256 |
| VLF, median (IQR), ms2 | 24.0 (20.5-88.7) | 66.0 (18.9-136.7) | p = 0.357 |
| VLF, median (IQR), log | 3.1 (3.0-4.4) | 4.1 (2.9-4.8) | p = 0.365 |
| LF, median (IQR), ms2 | 139.7 (22.7-252.3) | 387.5 (110.9-744.7) | p = 0.056 |
| LF, median (IQR), log | 4.9 (3.1-5.5) | 5.8 (4.6-6.5) | p = 0.067 |
| LF, median (IQR), n.u. | 58.1 (53.1-59.8) | 65.3 (55.0-73.8) | p = 0.252 |
| HF, median (IQR), ms2 | 93.3 (37.4-125.8) | 194.7 (73.3-341.1) | p = 0.099 |
| HF, median (IQR), log | 4.5 (3.6-4.8) | 5.2 (4.2-5.8) | p = 0.106 |
| HF, median (IQR), n.u. | 41.7 (39.9-46.6) | 34.0 (25.8-44.3) | p = 0.216 |
| LF/HF median (IQR) | 1.3 (1.1-1.4) | 1.9 (1.2-2.8) | p = 0.199 |
| SD1, median (IQR), ms | 36.7 (22.7-49.1) | 25.7 (17.2-36.6) | p = 0.234 |
| SD2, median (IQR), ms | 27.2 (18.2-39.5) | 32.7 (22.4-48.0) | p = 0.499 |
| SD2/SD1, median (IQR) | 0.8 (0.7-0.8) | 1.2 (1.0-1.5) | **p = 0.006** |
| ApEn, median (IQR) | 1.0 (0.6-1.0) | 1.0 (0.9-1.1) | p = 0.188 |
| *HRV in the last 5 minutes of PCI* | | | |
| SDNN, median (IQR), ms | 24.3 (19.3-44.7) | 28.4 (19.1-38.7) | p = 0.944 |
| RMSSD, median (IQR), ms | 34.2 (28.2-45.2) | 29.8 (21.9-45.7) | p = 0.429 |
| NN50, median (IQR), beats | 39.0 (18.0-40.0) | 18.0 (7.0-47.2) | p = 0.333 |
| pNN50, median (IQR), % | 10.2 (4.0-21.9) | 4.5 (1.8-17.4) | p = 0.246 |
| RR triangular index, median (IQR), ms | 4.7 (4.3-7.1) | 6.1 (4.5-8.0) | p = 0.580 |
| VLF, median (IQR), ms2 | 35.5 (18.7-77.9) | 40.2 (23.2-155.0) | p = 0.489 |
| VLF, median (IQR), log | 3.5 (2.9-4.3) | 3.69 (3.1-5.0) | p = 0.456 |
| LF, median (IQR), ms2 | 400.4 (81.8-424.4) | 337.1 (106.5-794.2) | p = 0.377 |
| LF, median (IQR), log | 5.9 (4.4-6.0) | 5.7 (4.6-6.6) | p = 0.352 |
| LF, median (IQR), n.u. | 72.9 (51.0-74.6) | 65.1 (56.2-75.0) | p = 0.932 |
| HF, median (IQR), ms2 | 129.6 (78.3-143.6) | 168.0 (59.3-328.7) | p = 0.279 |
| HF, median (IQR), log | 4.8 (4.3-4.9) | 5.1 (4.0-5.6) | p = 0.262 |
| HF, median (IQR), n.u. | 26.8 (25.2-48.8) | 34.4 (24.8-43.0) | p = 0.944 |
| LF/HF median (IQR) | 2.7 (1.0-2.9) | 1.8 (1.3-2.9) | p = 0.938 |
| SD1, median (IQR), ms | 24.2 (19.9-32.0) | 21.1 (15.5-32.4) | p = 0.429 |
| SD2, median (IQR), ms | 24.4 (18.8-33.6) | 32.3 (21.4-46.4) | p = 0.329 |
| SD2/SD1, median (IQR) | 1.0 (0.9-1.0) | 1.3 (1.0-1.6) | **p = 0.018** |
| ApEn, median (IQR) | 1.0 (0.8-1.0) | 1.0 (1.0-1.1) | p = 0.165 |
| ApEn = approximate entropy; HF = power in high-frequency range; LF = power in low-frequency range; NN50 = the number of pairs of successive NN (R-R) intervals that differ by more than 50 ms; pNN50 = the proportion of NN50 divided by the total number of NN (R-R) intervals; RMSSD = the square root of the mean squared differences of consecutive NN intervals; SDANN = the standard deviation of the average NN interval over short time divisions; SDNN = the standard deviation of all NN intervals; VLF = power in very-low-frequency range. | | | |
